# Supplementary material for: Synthesis and redox reactions of bis(verdazyl)palladium complexes
Source: Royal Society of Chemistry journal article supplement (doi:10.1039/c7dt02646c), 2017-01-01
Supplement: c7dt02646c1.pdf [file c7dt02646c1.pdf]

# Synthesis and redox reactions of bis(verdazyl)palladium complexes

Corey A. Sanz, Zach R. McKay, Shaun W.C. MacLean, Brian O. Patrick, and Robin G. Hicks

## Supporting Information

### Contents:

|                                                                |     |
|----------------------------------------------------------------|-----|
| Crystallographic data .....                                    | S2  |
| <sup>1</sup> H NMR spectra of <b>5</b> .....                   | S3  |
| COSY spectrum of <b>5</b> .....                                | S5  |
| <sup>13</sup> C NMR spectra of <b>5</b> .....                  | S6  |
| <sup>1</sup> H NMR spectra of <b>7</b> .....                   | S7  |
| <sup>13</sup> C NMR spectrum of <b>7</b> .....                 | S10 |
| Electronic Spectra of <b>3</b> and <b>4</b> .....              | S11 |
| Electronic Spectra of <b>5</b> , <b>6</b> , and <b>7</b> ..... | S12 |
| EPR spectra of <b>3</b> , <b>4</b> , and <b>6</b> .....        | S13 |
| EPR parameters .....                                           | S14 |
| Initial xyz coordinates for computational studies .....        | S15 |



**Table S1.** Crystallographic data for **4**, **5**, **6**, and **7**

|                                               | <b>4</b>                                                                                         | <b>5</b>                                                          | <b>6</b>                                                            | <b>7</b>                                                                          |
|-----------------------------------------------|--------------------------------------------------------------------------------------------------|-------------------------------------------------------------------|---------------------------------------------------------------------|-----------------------------------------------------------------------------------|
| Empirical Formula                             | C <sub>28</sub> H <sub>42</sub> B <sub>2</sub> F <sub>8</sub> N <sub>10</sub> O <sub>3</sub> PdS | C <sub>26</sub> H <sub>36</sub> N <sub>10</sub> O <sub>2</sub> Pd | C <sub>26</sub> H <sub>36</sub> ClN <sub>10</sub> O <sub>2</sub> Pd | C <sub>13</sub> H <sub>20</sub> Cl <sub>2</sub> N <sub>5</sub> OPd <sub>0.5</sub> |
| Formula Weight                                | 878.79                                                                                           | 627.05                                                            | 662.50                                                              | 386.44                                                                            |
| <i>a</i> (Å)                                  | 9.2988(4)                                                                                        | 9.7686(5)                                                         | 18.4316(5)                                                          | 14.3982(19)                                                                       |
| <i>b</i> (Å)                                  | 22.7666(9)                                                                                       | 10.5532(5)                                                        | 8.8810(2)                                                           | 8.6271(12)                                                                        |
| <i>c</i> (Å)                                  | 18.2185(7)                                                                                       | 14.0846(7)                                                        | 18.9892(5)                                                          | 14.4349(19)                                                                       |
| α (deg)                                       | 90                                                                                               | 77.023(2)                                                         | 90                                                                  | 90                                                                                |
| β (deg)                                       | 92.149(3)                                                                                        | 77.476(2)                                                         | 108.3960(10)                                                        | 107.688(3)                                                                        |
| γ (deg)                                       | 90                                                                                               | 77.674(2)                                                         | 90                                                                  | 90                                                                                |
| <i>V</i> (Å <sup>3</sup> )                    | 3854.2(3)                                                                                        | 1360.35(12)                                                       | 2949.52(13)                                                         | 1708.3(4)                                                                         |
| <i>Z</i>                                      | 4                                                                                                | 2                                                                 | 4                                                                   | 4                                                                                 |
| space group                                   | P2 <sub>1</sub> /n                                                                               | P-1                                                               | P2 <sub>1</sub> /n                                                  | P2 <sub>1</sub> /c                                                                |
| <i>T</i> (K)                                  | 90                                                                                               | 100                                                               | 90                                                                  | 90                                                                                |
| λ (Å)                                         | 1.54178                                                                                          | 0.71073                                                           | 0.71073                                                             | 0.71073                                                                           |
| D <sub>calcd</sub> (g cm <sup>-3</sup> )      | 1.514                                                                                            | 1.531                                                             | 1.492                                                               | 1.503                                                                             |
| μ (mm <sup>-1</sup> )                         | 5.129                                                                                            | 0.727                                                             | 0.762                                                               | 0.896                                                                             |
| <i>R</i> [all data] <sup>a</sup>              | 0.0998                                                                                           | 0.0398                                                            | 0.0422                                                              | 0.0288                                                                            |
| <i>R</i> <sub>w</sub> [all data] <sup>b</sup> | 0.1904                                                                                           | 0.0611                                                            | 0.0642                                                              | 0.0584                                                                            |
| CCDC#                                         | 1415460                                                                                          | 1415461                                                           | 1415462                                                             | 1415463                                                                           |

<sup>a</sup>  $R = \sum |F_{\text{obs}} - F_{\text{calc}}| / \sum |F_{\text{obs}}|$ . <sup>b</sup>  $R_w = [\sum (|w| |F_{\text{obs}} - F_{\text{calc}}|)^2 / \sum |w F_{\text{obs}}^2|]^{1/2}$ .

Figure S1.  $^1\text{H}$  NMR of **5** ( $\text{CDCl}_3$ , 360 MHz)

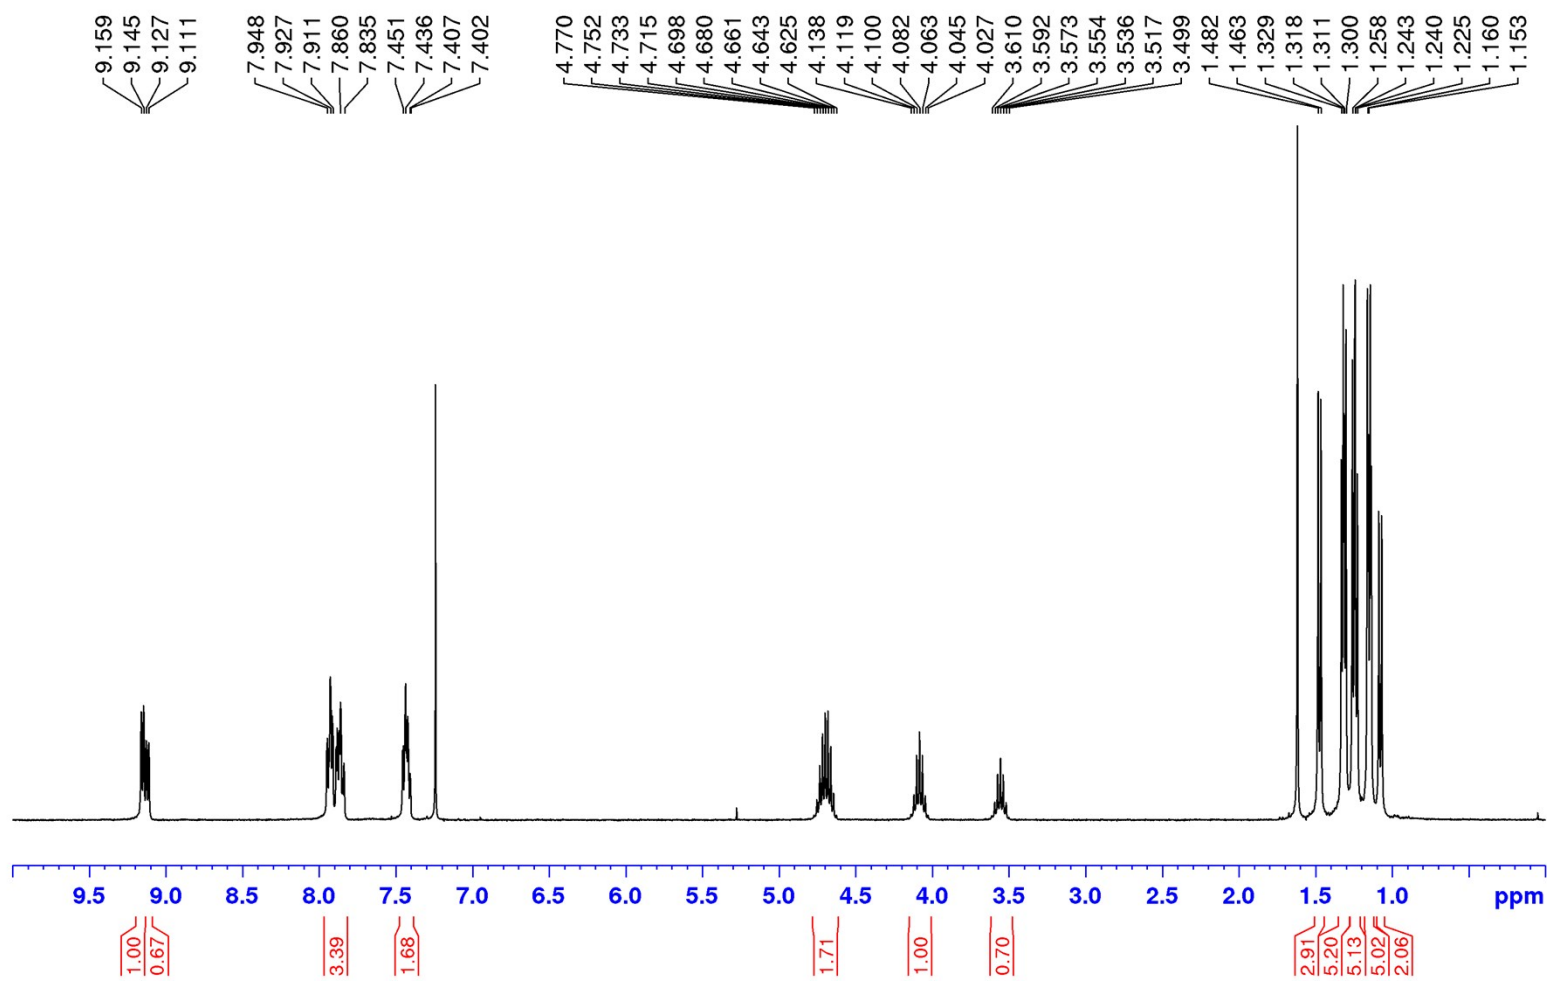

Figure S2.  $^1\text{H}$  NMR of **5** ( $\text{CDCl}_3$ , 360 MHz) - *Expansions*

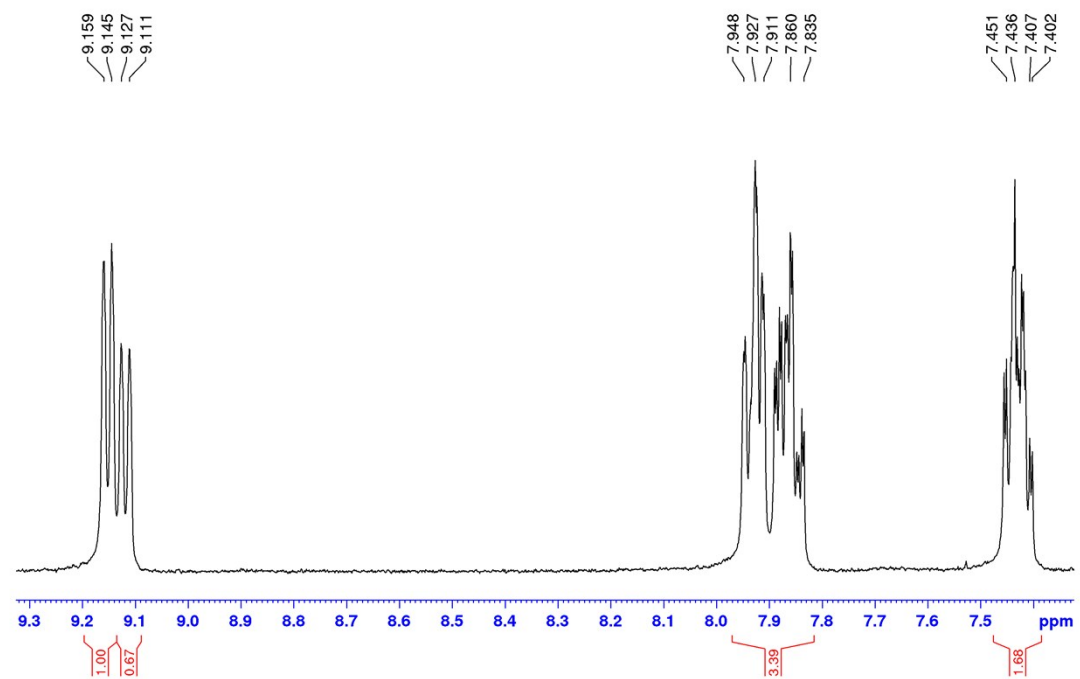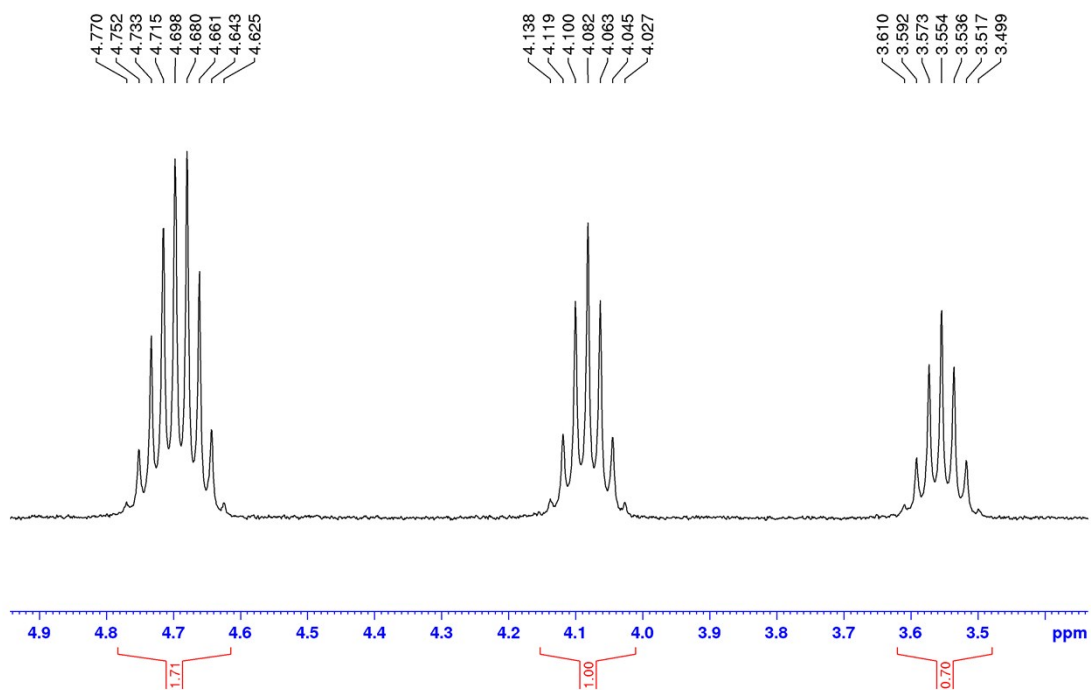

Figure S3:  $^1\text{H}$  NMR of **5** ( $\text{CDCl}_3$ , 360 MHz) – *Expansions*

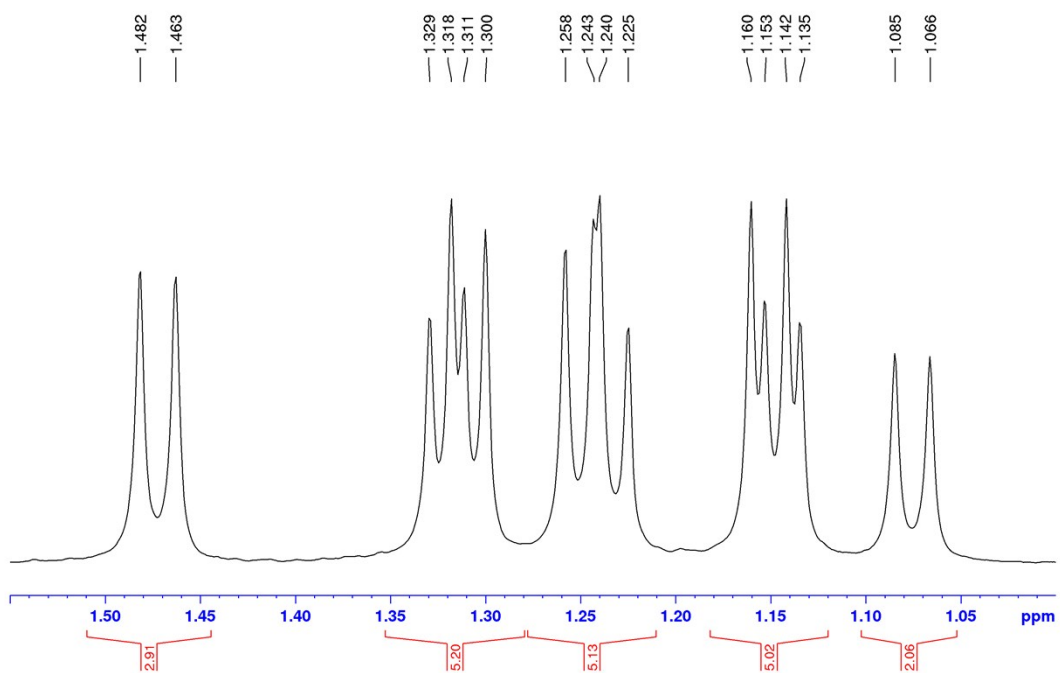

Figure S4. COSY of **5** ( $\text{CDCl}_3$ , 360 MHz)

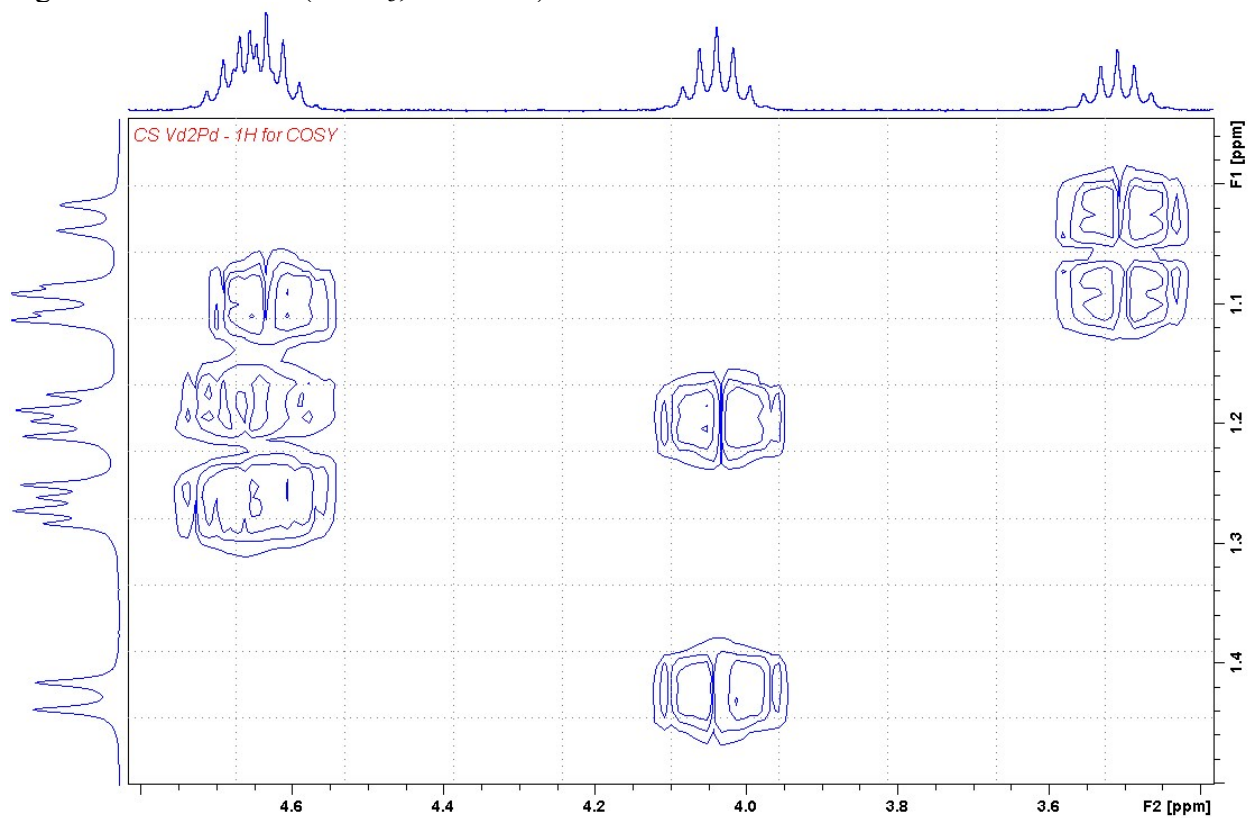

Figure S5.  $^{13}\text{C}$  NMR of **5**( $\text{CDCl}_3$ , 90.6 MHz)

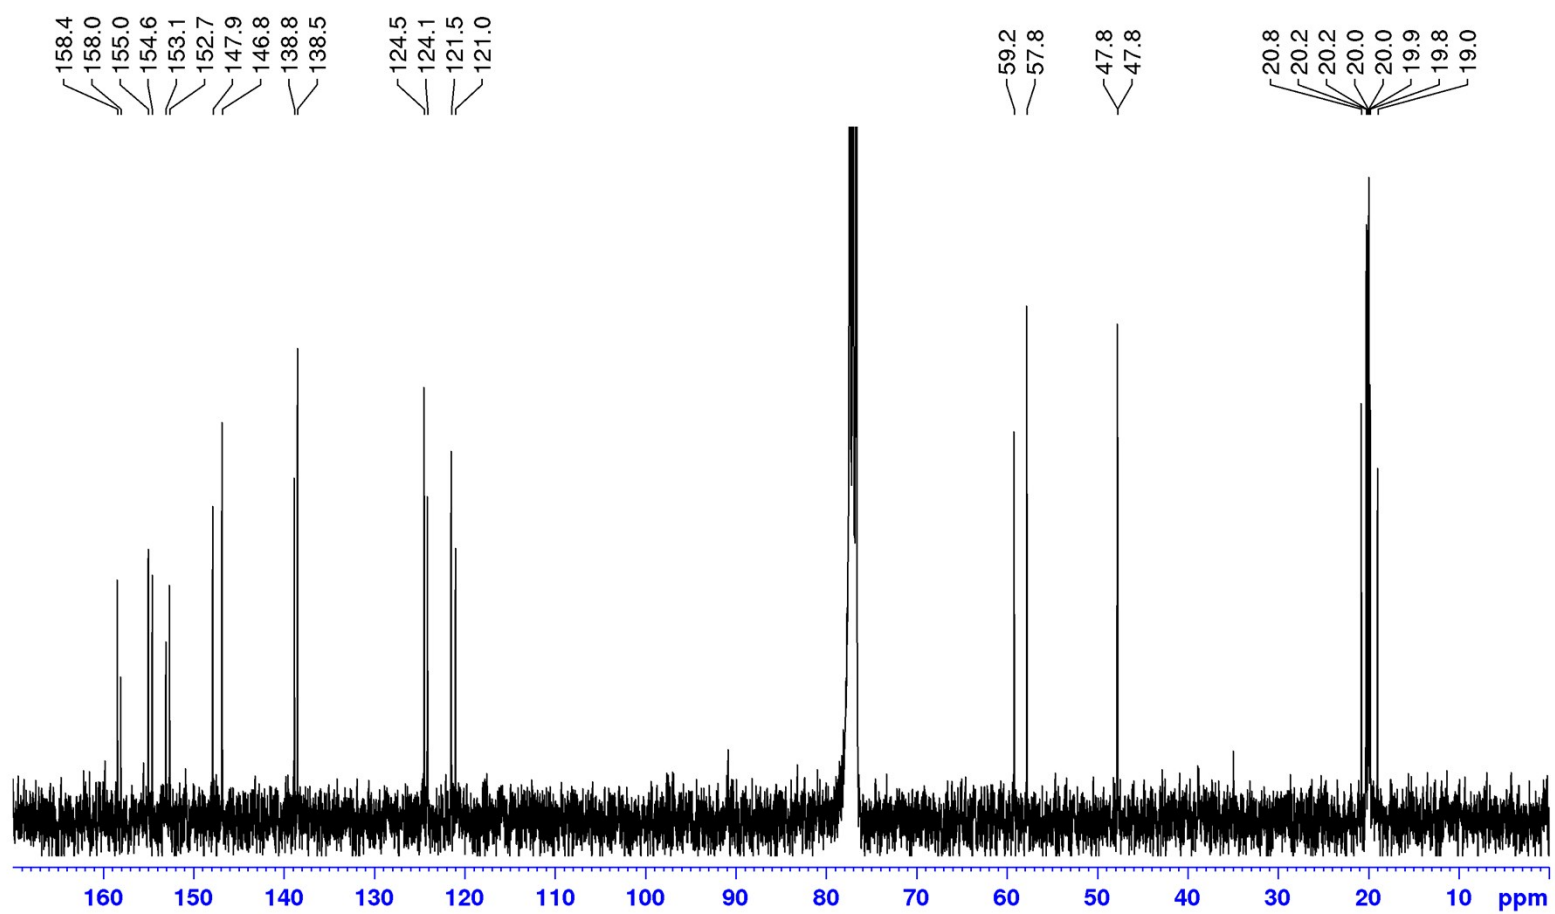

Figure S6  $^1\text{H}$  NMR of **7** (DMSO- $d_6$ , 300 MHz, 298 K)

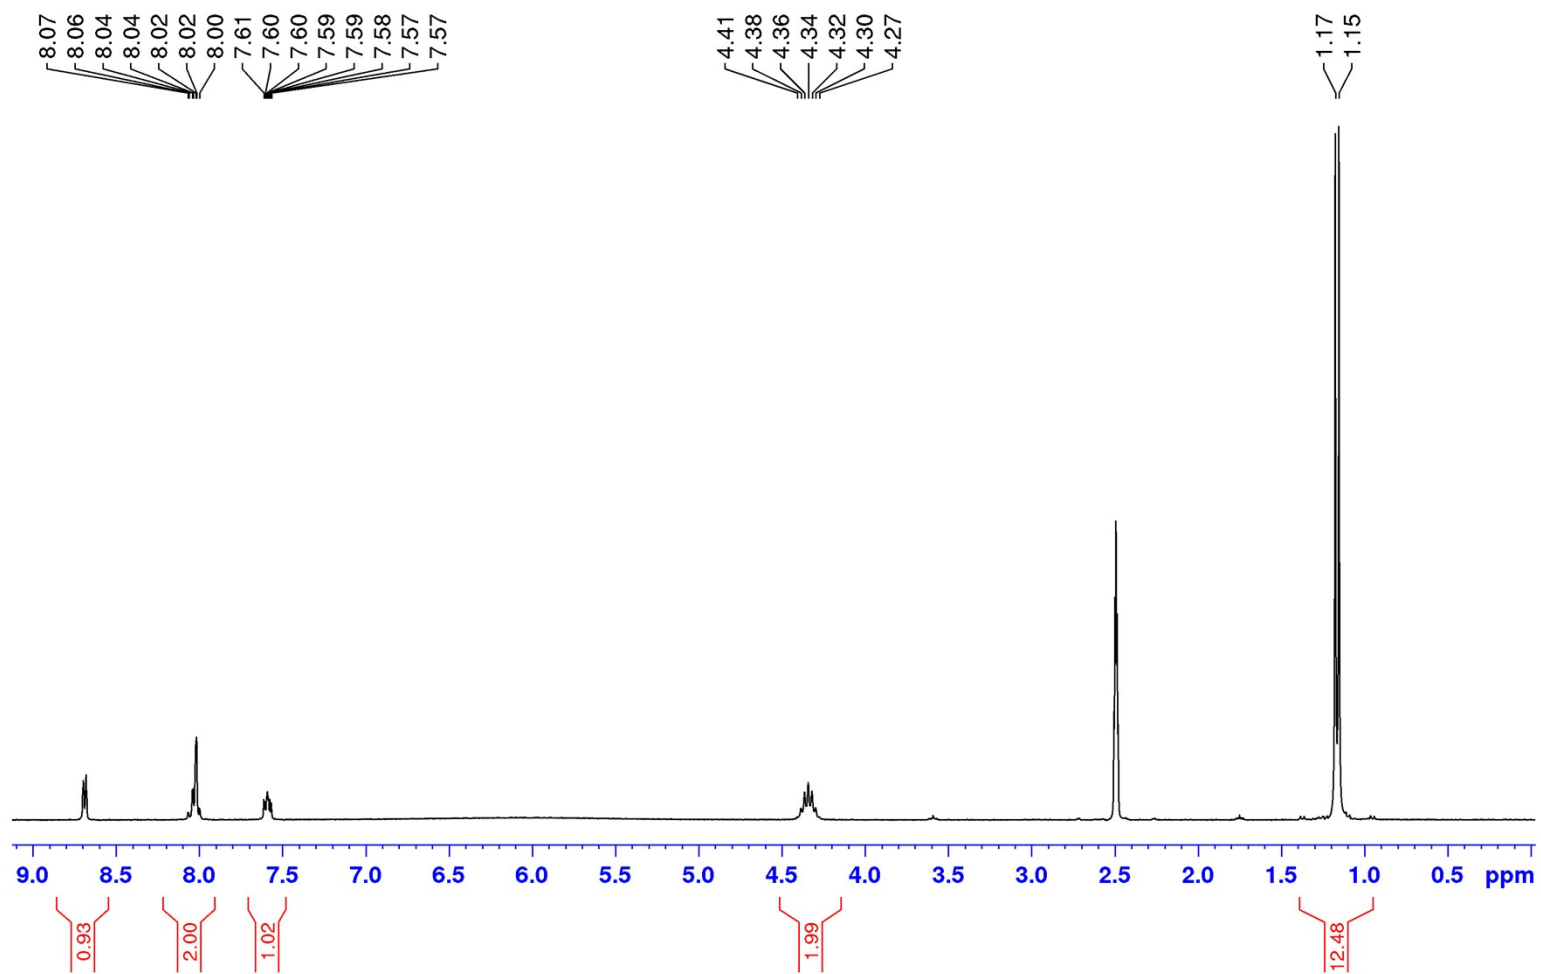



Figure S7.  $^1\text{H}$  NMR of **7** (DMSO- $d_6$ , 300 MHz, 298 K) - *Expansions*

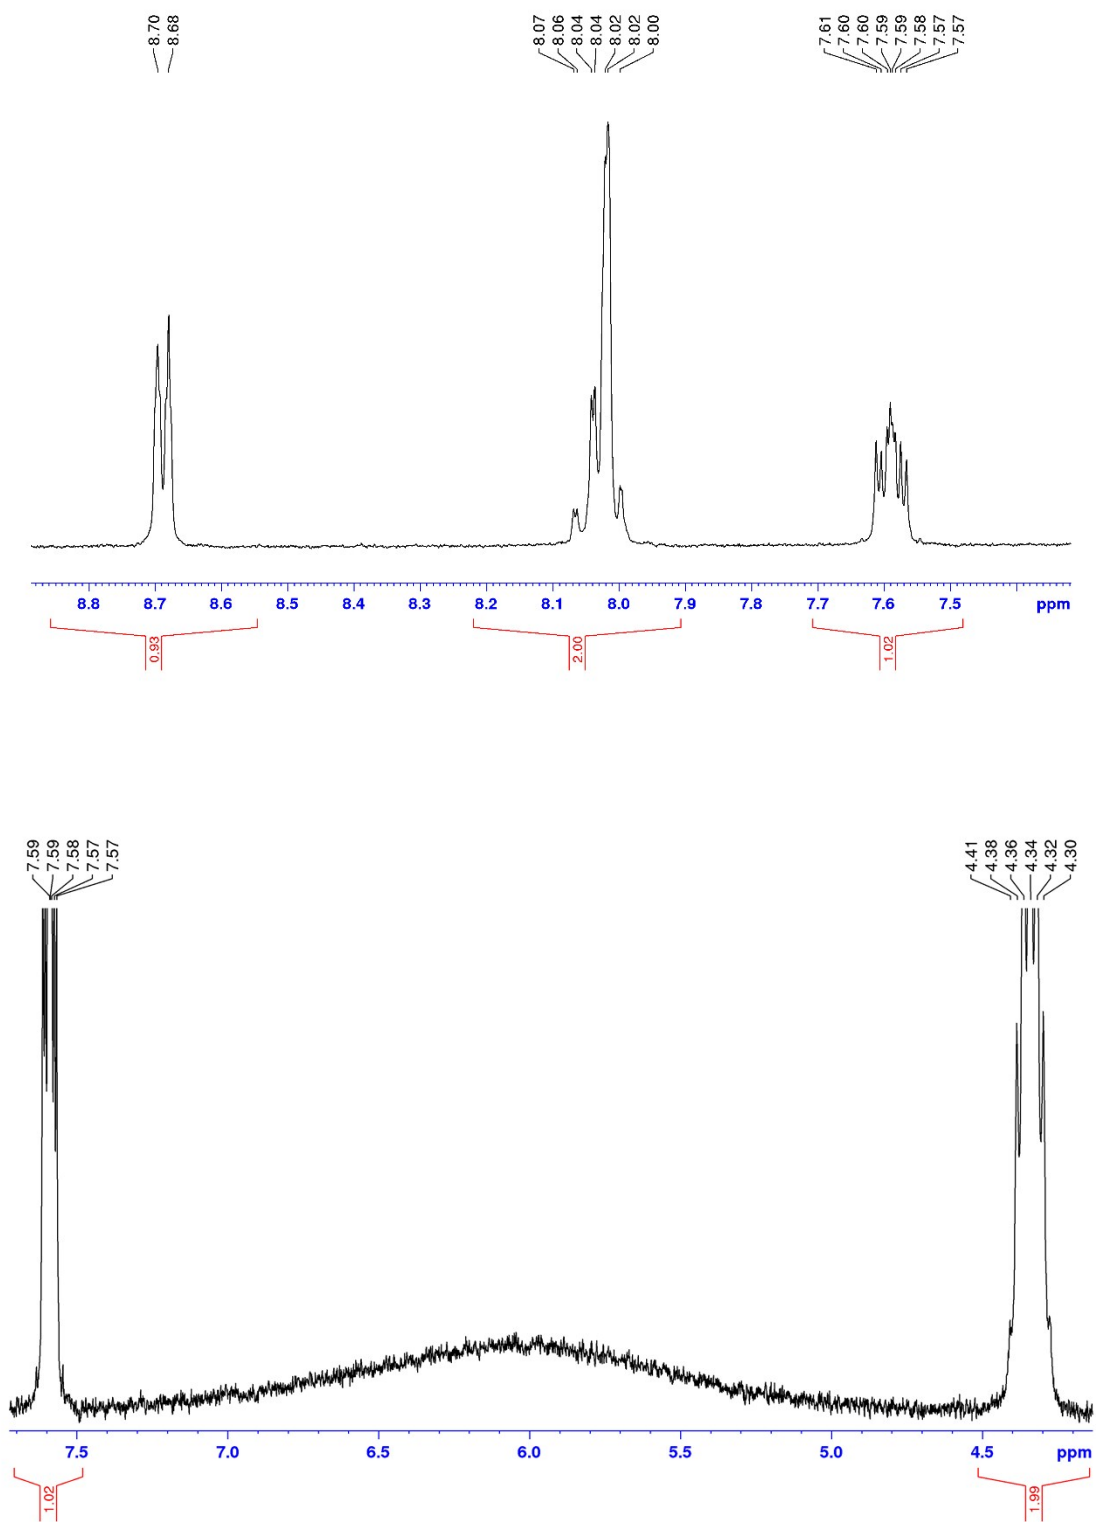

**Figure S8.**  $^1\text{H}$  NMR of **7** ( $\text{CD}_3\text{CN}$ , 500 MHz, 233 K)

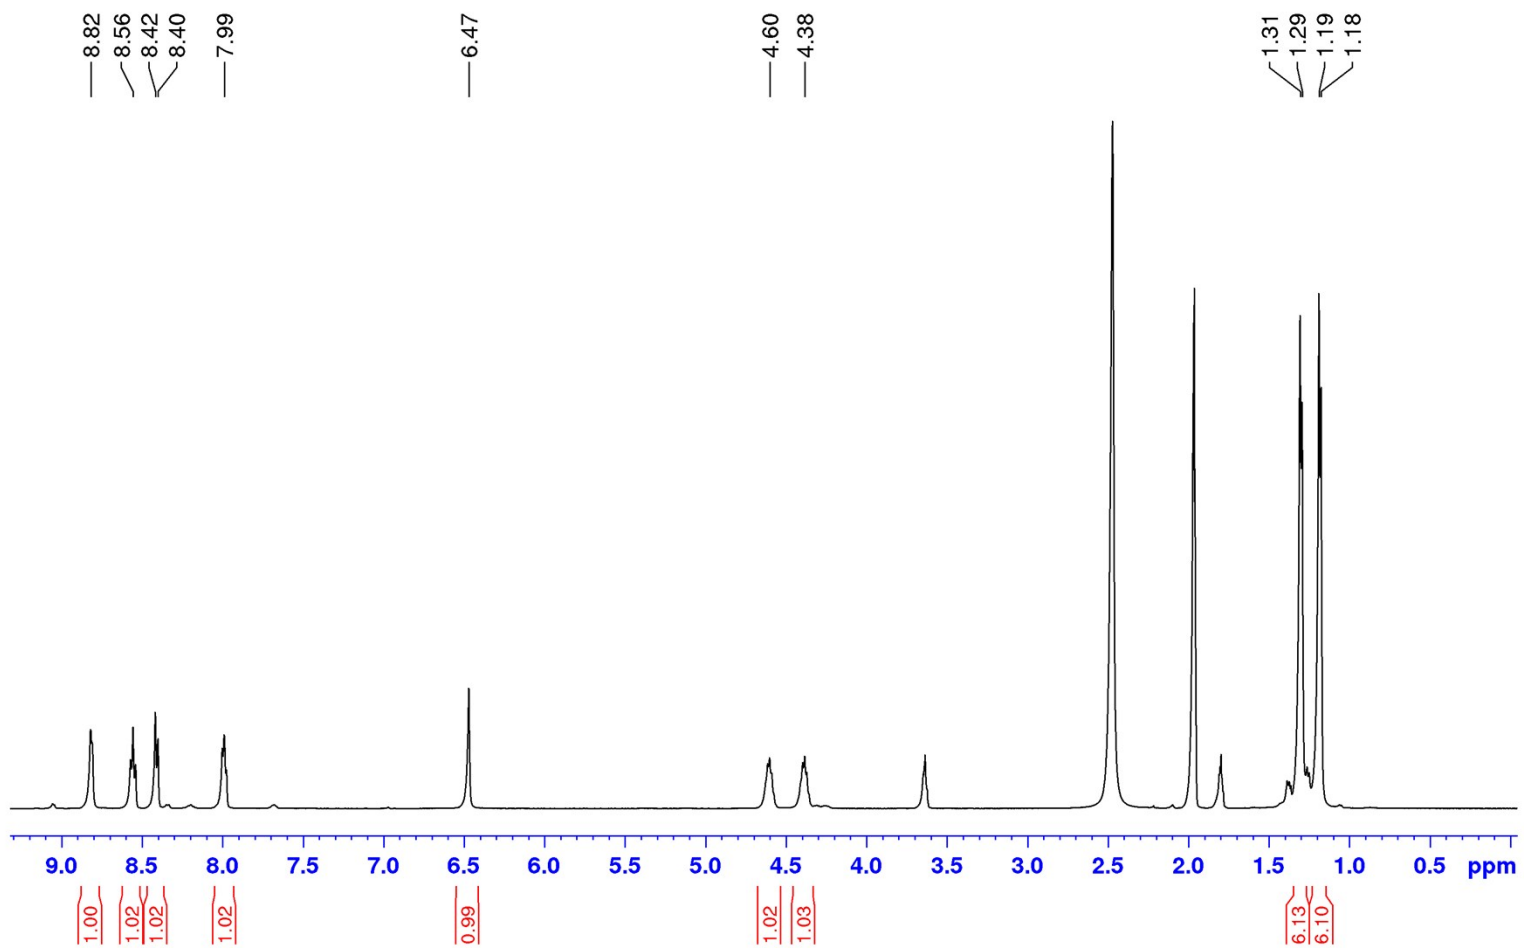

**Figure S9.**  $^{13}\text{C}$  NMR of **7** (DMSO- $d_6$ , 75.5 MHz, 298 K)

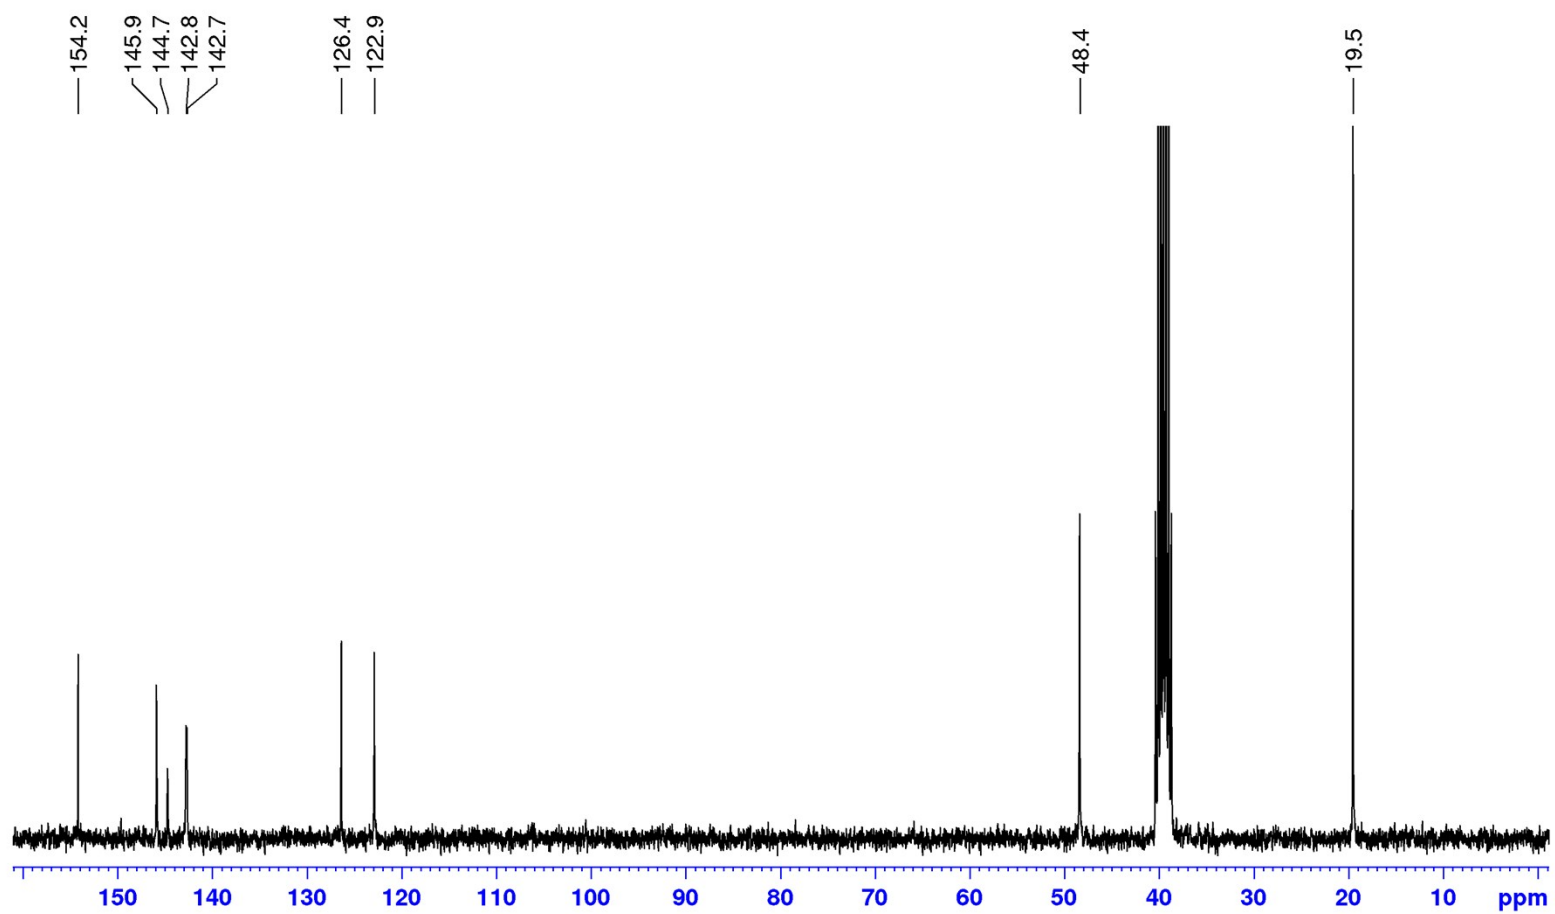

Figure S10. Electronic spectra of **3** (black dotted line) and **4** (black solid line) in dichloromethane

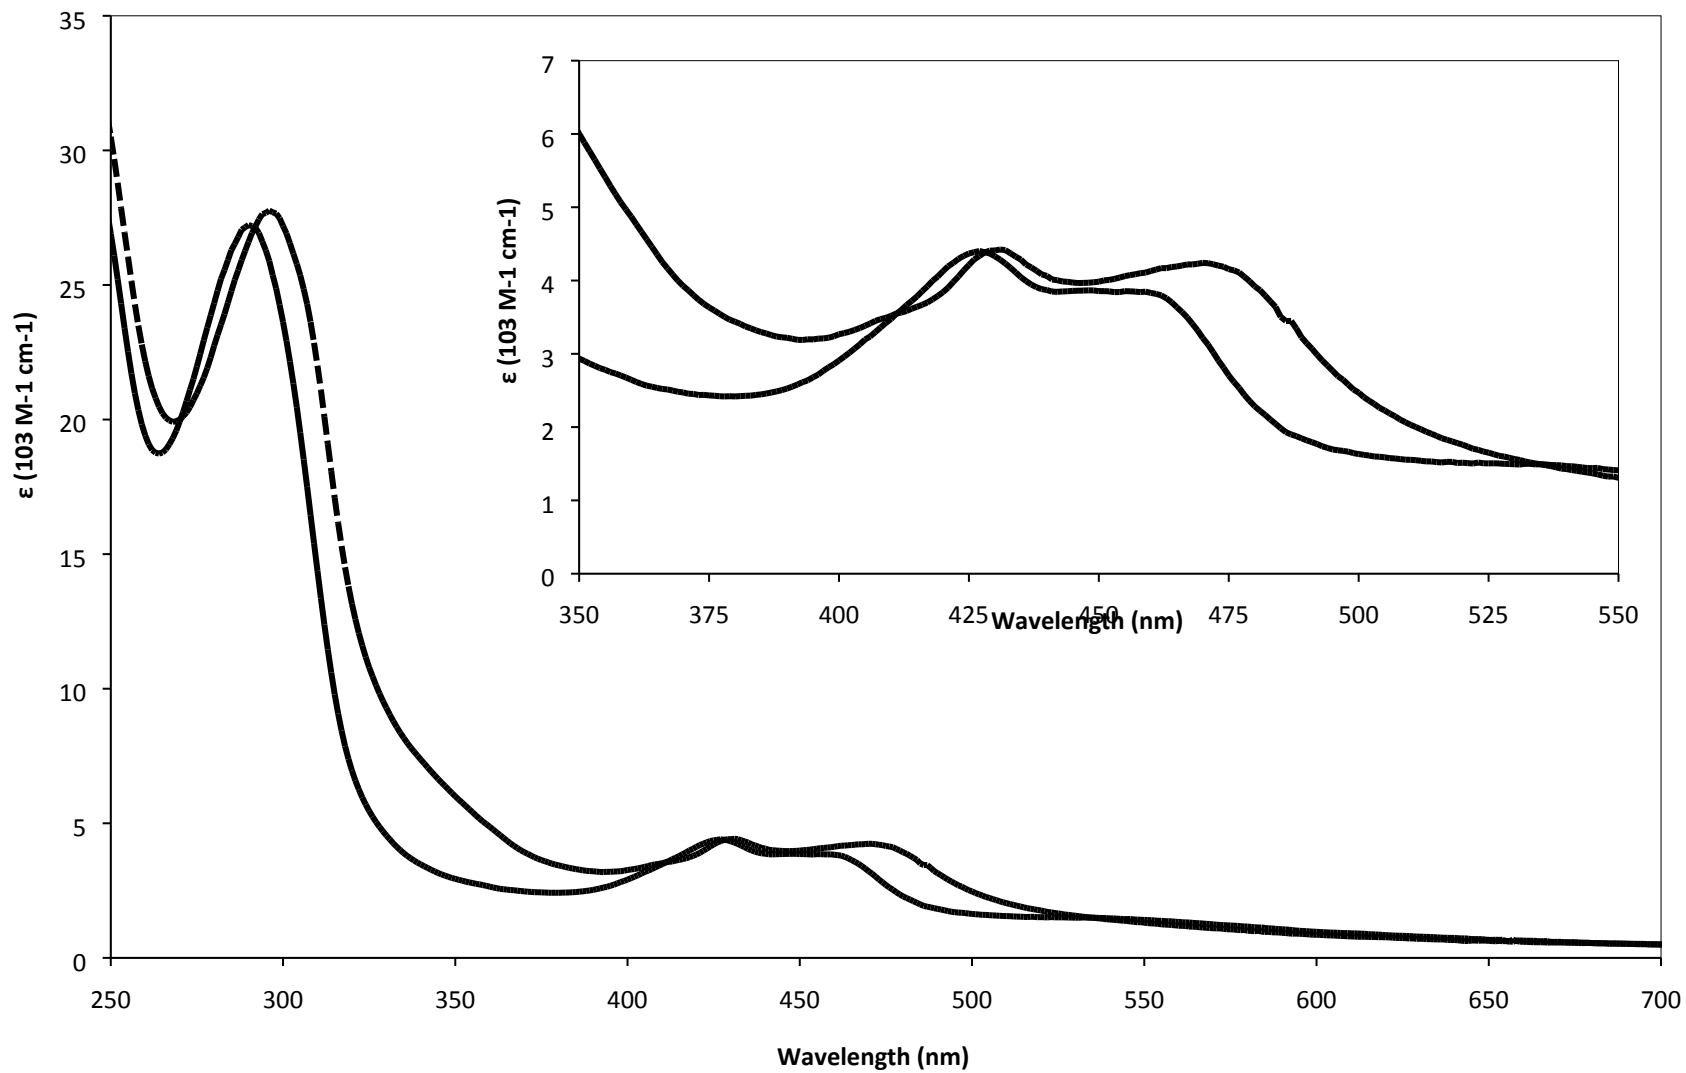

Figure S11. Electronic spectra of **5** (red line, dichloromethane), **6** (blue line, dichloromethane), and **7** (green line, acetonitrile). The inset contains bis-radical complex **4** for comparison (black line) and **7** has been omitted from the inset for clarity.

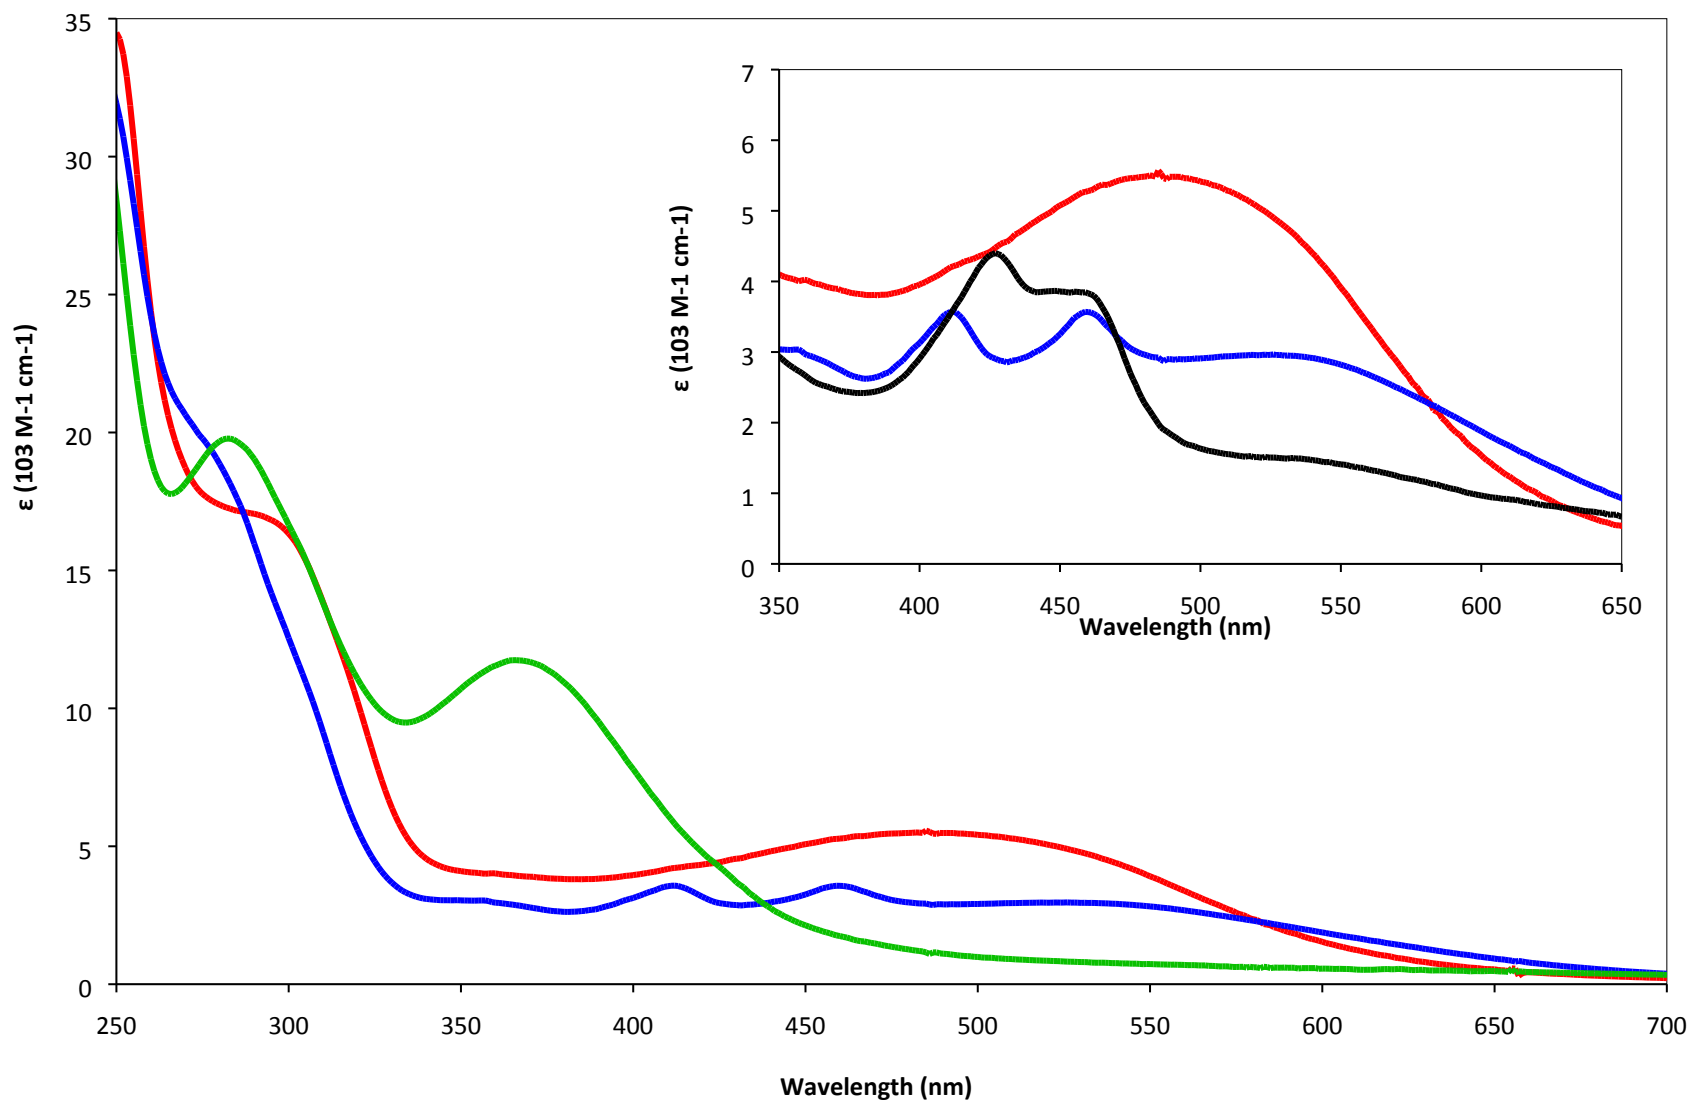

Figure S12. EPR spectra of **3** (red line), **4** (black line), and **6** (blue line) in dichloromethane. The bold lines represent the experimental spectra and the thin lines represent simulated spectra.

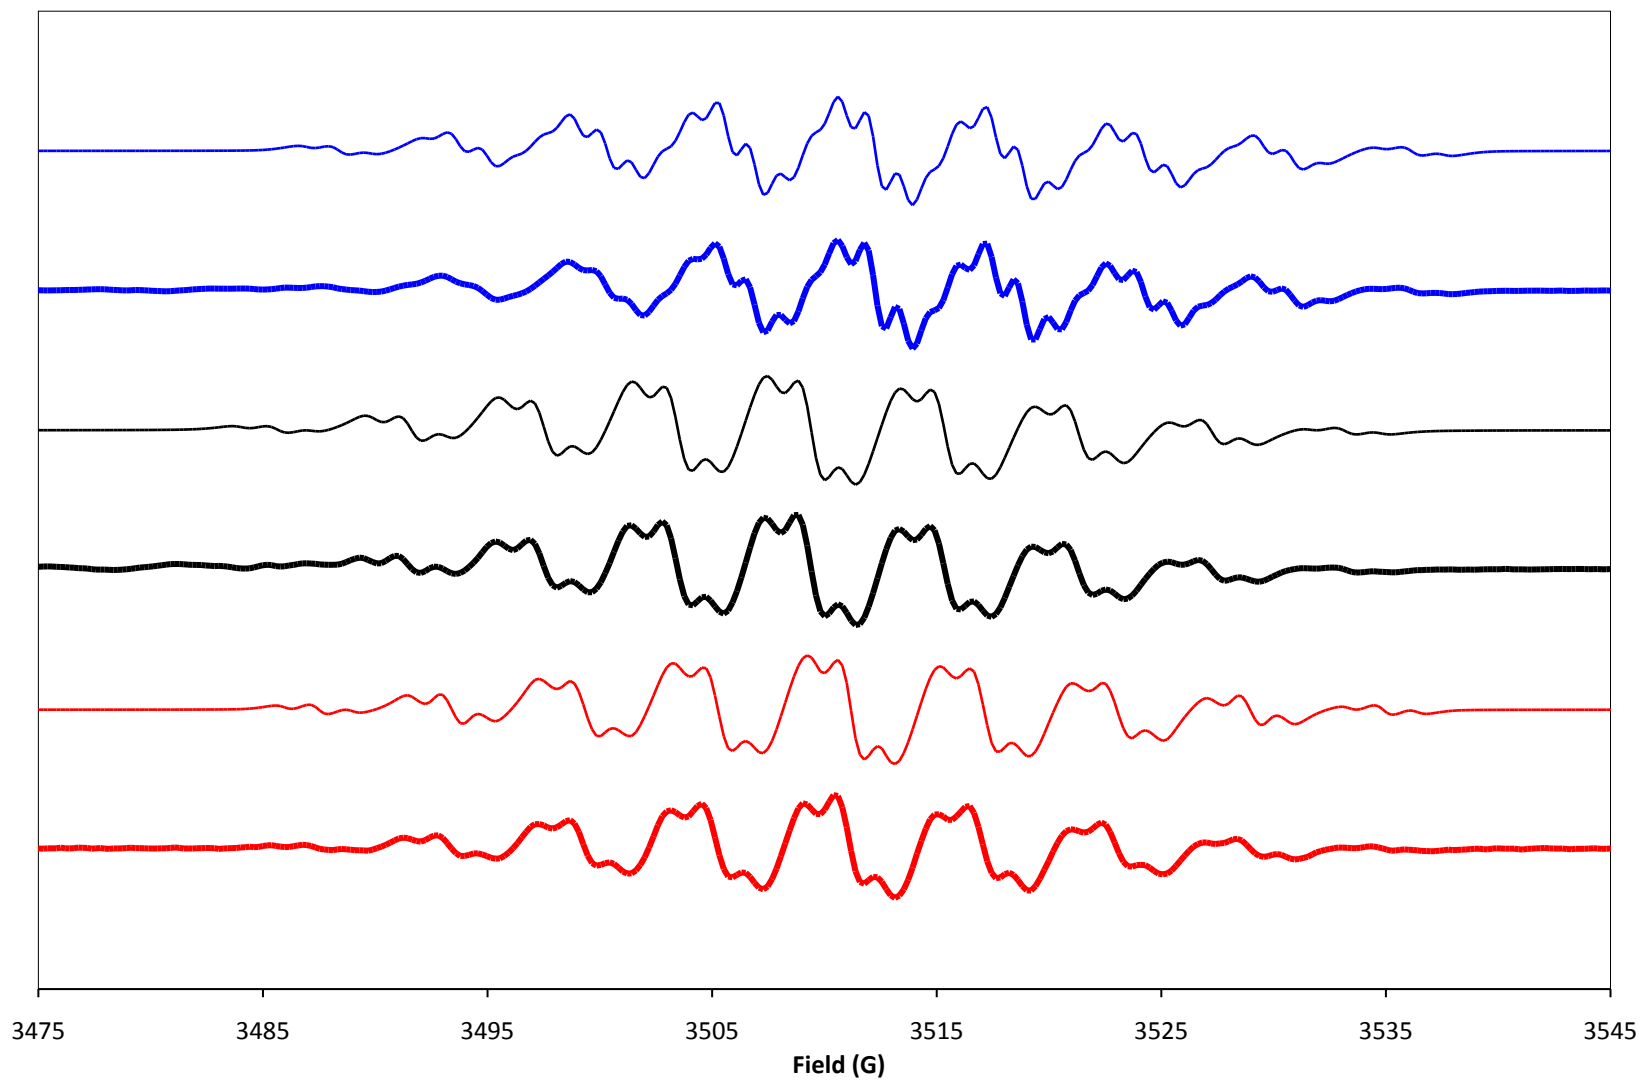

Table S2. EPR Parameters

| Compound                     | <b>3</b> | <b>4</b> | <b>6</b> |
|------------------------------|----------|----------|----------|
| Frequency (GHz)              | 9.8458   | 9.8438   | 9.8528   |
| $g$                          | 2.0047   | 2.0046   | 2.0049   |
| $a(\text{N})^{\text{a}}$ (G) | 5.7      | 5.8      | 5.4      |
| $a(\text{N})^{\text{a}}$ (G) | 6.1      | 6.1      | 6.6      |
| $a(\text{H})^{\text{b}}$ (G) | 1.5      | 1.5      | 1.4      |

a) Two equivalent  $^{14}\text{N}$  nuclei

b)  $\text{CH}$  of isopropyl groups (two equivalent  $^1\text{H}$  nuclei)

Table S3. Initial coordinates for computational study of 5

|    |           |           |           |
|----|-----------|-----------|-----------|
| C  | 3.497601  | -0.568662 | 9.299248  |
| C  | 5.982665  | -1.015187 | 8.361314  |
| C  | 4.696071  | 1.343547  | 10.193960 |
| H  | 3.922522  | 1.298791  | 10.824607 |
| C  | 5.915422  | 0.779943  | 10.920778 |
| H  | 5.777648  | -0.174133 | 11.097451 |
| H  | 6.038892  | 1.254714  | 11.768755 |
| H  | 6.711867  | 0.896184  | 10.361313 |
| C  | 4.907285  | 2.803632  | 9.831969  |
| H  | 5.629213  | 2.876600  | 9.174037  |
| H  | 5.145638  | 3.308558  | 10.636858 |
| H  | 4.080498  | 3.168478  | 9.450933  |
| C  | 3.219534  | -3.021622 | 9.335988  |
| H  | 2.309855  | -2.740767 | 9.642734  |
| C  | 3.850179  | -3.865373 | 10.438709 |
| H  | 4.713255  | -4.211748 | 10.131692 |
| H  | 3.257061  | -4.613865 | 10.657119 |
| H  | 3.984329  | -3.312811 | 11.236575 |
| C  | 3.056277  | -3.819887 | 8.052001  |
| H  | 2.628056  | -3.259659 | 7.370836  |
| H  | 2.497129  | -4.606604 | 8.224486  |
| H  | 3.936599  | -4.108365 | 7.732827  |
| C  | 7.390170  | -1.132443 | 7.949887  |
| C  | 9.131838  | -0.044507 | 6.856620  |
| H  | 9.443297  | 0.673128  | 6.317281  |
| C  | 10.026407 | -1.020388 | 7.268723  |
| H  | 10.947679 | -0.949798 | 7.048016  |
| C  | 9.564302  | -2.099340 | 8.006076  |
| H  | 10.160529 | -2.787187 | 8.277164  |
| C  | 8.223461  | -2.161641 | 8.341323  |
| H  | 7.882111  | -2.900127 | 8.832307  |
| N  | 4.011654  | -1.805351 | 9.086241  |
| N  | 5.381636  | -2.052456 | 8.853378  |
| N  | 5.461288  | 0.213271  | 8.167486  |
| N  | 4.338417  | 0.533541  | 8.981561  |
| N  | 7.834683  | -0.091505 | 7.204564  |
| O  | 2.374494  | -0.369563 | 9.744173  |
| Pd | 6.411413  | 1.285042  | 6.753561  |
| C  | 9.325224  | 3.138745  | 4.207874  |
| C  | 6.840160  | 3.585270  | 5.145808  |
| C  | 8.126754  | 1.226536  | 3.313162  |
| H  | 8.900303  | 1.271292  | 2.682514  |
| C  | 6.907403  | 1.790140  | 2.586344  |
| H  | 7.045177  | 2.744216  | 2.409671  |
| H  | 6.783933  | 1.315369  | 1.738367  |
| H  | 6.110958  | 1.673899  | 3.145809  |
| C  | 7.915540  | -0.233549 | 3.675153  |
| H  | 7.193612  | -0.306517 | 4.333085  |
| H  | 7.677187  | -0.738475 | 2.870263  |
| H  | 8.742327  | -0.598395 | 4.056189  |
| C  | 9.603291  | 5.591705  | 4.171134  |
| H  | 10.512970 | 5.310850  | 3.864388  |
| C  | 8.972646  | 6.435456  | 3.068413  |
| H  | 8.109570  | 6.781831  | 3.375430  |
| H  | 9.565764  | 7.183948  | 2.850003  |
| H  | 8.838496  | 5.882894  | 2.270547  |
| C  | 9.766548  | 6.389970  | 5.455121  |
| H  | 10.194769 | 5.829742  | 6.136285  |
| H  | 10.325696 | 7.176687  | 5.282635  |
| H  | 8.886226  | 6.678448  | 5.774295  |
| C  | 5.432655  | 3.702526  | 5.557235  |
| C  | 3.690987  | 2.614590  | 6.650502  |
| H  | 3.379528  | 1.896955  | 7.189841  |
| C  | 2.796418  | 3.590471  | 6.238399  |
| H  | 1.875146  | 3.519882  | 6.459106  |
| C  | 3.258523  | 4.669423  | 5.501046  |
| H  | 2.662296  | 5.357270  | 5.229958  |
| C  | 4.599364  | 4.731724  | 5.165799  |



|   |           |          |          |
|---|-----------|----------|----------|
| H | 4.940714  | 5.470210 | 4.674815 |
| N | 8.811171  | 4.375434 | 4.420881 |
| N | 7.441189  | 4.622539 | 4.653744 |
| N | 7.361537  | 2.356812 | 5.339635 |
| N | 8.484408  | 2.036542 | 4.525561 |
| N | 4.988142  | 2.661588 | 6.302558 |
| O | 10.448331 | 2.939646 | 3.762949 |

Table S4. Initial coordinates for computational study of **6**

|    |             |             |             |
|----|-------------|-------------|-------------|
| Pd | 10.57860000 | 3.79950000  | 5.94890000  |
| Cl | 10.39110000 | 5.03760000  | 4.00050000  |
| O  | 12.13120000 | 2.21820000  | 10.72520000 |
| O  | 9.32620000  | 6.96350000  | 10.94120000 |
| N  | 9.95860000  | 2.65100000  | 10.18780000 |
| N  | 8.91320000  | 2.32950000  | 9.27500000  |
| N  | 10.55690000 | 2.62560000  | 7.57550000  |
| N  | 11.60490000 | 2.48800000  | 8.52490000  |
| N  | 8.71890000  | 2.99750000  | 5.82080000  |
| N  | 11.43530000 | 6.27800000  | 10.41040000 |
| N  | 12.34720000 | 5.81340000  | 9.50490000  |
| N  | 10.66070000 | 5.97660000  | 7.81310000  |
| N  | 9.80860000  | 6.46810000  | 8.76580000  |
| N  | 12.48210000 | 4.50670000  | 6.20530000  |
| C  | 11.28050000 | 2.42100000  | 9.87160000  |
| C  | 9.30090000  | 2.43960000  | 8.04500000  |
| C  | 12.67840000 | 1.61280000  | 7.98050000  |
| H  | 12.72680000 | 1.80200000  | 7.00030000  |
| C  | 12.31680000 | 0.14560000  | 8.11620000  |
| H  | 12.29070000 | -0.09770000 | 9.06530000  |
| H  | 12.98910000 | -0.39960000 | 7.65800000  |
| H  | 11.43700000 | -0.01240000 | 7.71390000  |
| C  | 14.05250000 | 1.93340000  | 8.54990000  |
| H  | 14.18310000 | 2.90500000  | 8.56250000  |
| H  | 14.74170000 | 1.51870000  | 7.99130000  |
| H  | 14.11750000 | 1.58350000  | 9.46350000  |
| C  | 9.53280000  | 2.57190000  | 11.59460000 |
| H  | 10.31440000 | 2.83480000  | 12.15910000 |
| C  | 9.15420000  | 1.16700000  | 11.97870000 |
| H  | 8.32330000  | 0.91560000  | 11.52300000 |
| H  | 9.02160000  | 1.11720000  | 12.94830000 |
| H  | 9.87010000  | 0.55150000  | 11.71580000 |
| C  | 8.42460000  | 3.57190000  | 11.86250000 |
| H  | 8.711770000 | 4.46630000  | 11.58970000 |
| H  | 8.21320000  | 3.57550000  | 12.81860000 |
| H  | 7.62640000  | 3.31970000  | 11.35190000 |
| C  | 8.29510000  | 2.42010000  | 6.96540000  |
| C  | 7.89200000  | 3.04620000  | 4.76450000  |
| H  | 8.19660000  | 3.44410000  | 3.95690000  |
| C  | 6.61190000  | 2.53370000  | 4.82080000  |
| H  | 6.04710000  | 2.56930000  | 4.05780000  |
| C  | 6.15800000  | 1.96710000  | 5.99990000  |
| H  | 5.27440000  | 1.62610000  | 6.05970000  |
| C  | 7.00830000  | 1.90590000  | 7.08910000  |
| H  | 6.71890000  | 1.51870000  | 7.90670000  |
| C  | 10.12720000 | 6.58790000  | 10.10260000 |
| C  | 11.87210000 | 5.68300000  | 8.26670000  |
| C  | 8.45570000  | 6.84370000  | 8.29860000  |
| H  | 8.08840000  | 7.52580000  | 8.93190000  |
| C  | 8.52430000  | 7.47340000  | 6.92120000  |
| H  | 9.13950000  | 8.23710000  | 6.94080000  |
| H  | 7.63250000  | 7.77890000  | 6.65620000  |
| H  | 8.84700000  | 6.81080000  | 6.27420000  |
| C  | 7.53980000  | 5.63140000  | 8.33320000  |
| H  | 7.81090000  | 4.99730000  | 7.63820000  |
| H  | 6.61550000  | 5.91650000  | 8.17330000  |
| H  | 7.60110000  | 5.20070000  | 9.21120000  |
| C  | 11.94490000 | 6.48310000  | 11.78200000 |

|   |             |            |             |
|---|-------------|------------|-------------|
| H | 11.24880000 | 6.97600000 | 12.30320000 |
| C | 12.19380000 | 5.17230000 | 12.46000000 |
| H | 11.34800000 | 4.68740000 | 12.55370000 |
| H | 12.57910000 | 5.33130000 | 13.34650000 |
| H | 12.81660000 | 4.64030000 | 11.92300000 |
| C | 13.24150000 | 7.35880000 | 11.74830000 |
| H | 13.92510000 | 6.91120000 | 11.20590000 |
| H | 13.57790000 | 7.48140000 | 12.66000000 |
| H | 13.03490000 | 8.23270000 | 11.35550000 |
| C | 12.87870000 | 5.24780000 | 7.26010000  |
| C | 13.40410000 | 4.15630000 | 5.28080000  |
| H | 13.12940000 | 3.64030000 | 4.53170000  |
| C | 14.72920000 | 4.52310000 | 5.38690000  |
| H | 15.35450000 | 4.25580000 | 4.72450000  |
| C | 15.13880000 | 5.28420000 | 6.46480000  |
| H | 16.04690000 | 5.54970000 | 6.55520000  |
| C | 14.19560000 | 5.65190000 | 7.41310000  |
| H | 14.45070000 | 6.17670000 | 8.16250000  |
